# Supplementary material for: Bicarbonate-Dependent Detoxification by Mitigating Ammonium-Induced Hypoxic Stress in Triticum aestivum Root
Source: MDPI journal article supplement (doi:10.3390/biology13020101), 2024-02-05
Supplement: s1 [file s1]

**Table S1.** Fresh weight of wheat seedlings grown in different strengths of Hoagland nutrient solution for 48 h.

| Strength of Hoagland nutrient solution | Shoot (g plant <sup>-1</sup> ) | Root (g plant <sup>-1</sup> ) | Root/Shoot |
|----------------------------------------|--------------------------------|-------------------------------|------------|
| 1×                                     | 0.147 ± 0.008a                 | 0.102 ± 0.011c                | 0.6939     |
| 1/2×                                   | 0.140 ± 0.007ab                | 0.108 ± 0.005c                | 0.7714     |
| 1/3×                                   | 0.131 ± 0.007b                 | 0.098 ± 0.0021c               | 0.7481     |

**Table S2.** Quality assessment of RNA-Seq sequencing results.

| <b>Sample</b> | <b>Raw reads</b> | <b>Raw bases</b> | <b>Clean reads</b> | <b>Clean bases</b> | <b>Error rate</b> | <b>Q20 (%)</b> | <b>Q30 (%)</b> | <b>GC (%)</b> |
|---------------|------------------|------------------|--------------------|--------------------|-------------------|----------------|----------------|---------------|
| CK-1*         | 71263408         | 10.69G           | 68750162           | 10.31G             | 0.03              | 96.3           | 90.62          | 55.7          |
| CK-2*         | 79141928         | 11.87G           | 76469550           | 11.47G             | 0.03              | 96.49          | 91.06          | 55.78         |
| CK-3*         | 78414886         | 11.76G           | 75868586           | 11.38G             | 0.03              | 96.35          | 90.8           | 55.18         |
| SA-1          | 76828216         | 11.52G           | 74101802           | 11.12G             | 0.03              | 96.72          | 91.55          | 54.71         |
| SA-2          | 89181684         | 13.38G           | 85213634           | 12.78G             | 0.03              | 96.77          | 91.69          | 56.19         |
| SA-3          | 76717974         | 11.51G           | 74203576           | 11.13G             | 0.03              | 96.35          | 90.75          | 54.95         |
| AC-1          | 75958590         | 11.39G           | 73387174           | 11.01G             | 0.03              | 96.51          | 91.16          | 56.64         |
| AC-2          | 88898670         | 13.33G           | 86450208           | 12.97G             | 0.03              | 96.53          | 91.15          | 55.23         |
| AC-3          | 89463382         | 13.42G           | 85945562           | 12.89G             | 0.03              | 96.51          | 91.12          | 56.4          |

CK: 7.5 mM NO<sub>3</sub><sup>-</sup> treatment; SA: 7.5 mM NH<sub>4</sub><sup>+</sup> treatment; AN: 7.5 mM NH<sub>4</sub><sup>+</sup> + 3 mM HCO<sub>3</sub><sup>-</sup> treatment.

\*represents three biological replicates.
